# Supplementary material
Source: Research Square preprint supplement (doi:10.21203/rs.3.rs-9324161/v1)
Supplement: Supplementary file 1 [file b92fc308e02c585bfb6b84eb.docx]

**Direct Regeneration of Layered Oxide Cathodes via Seawater**

Ning Xue1, Yuanyuan Cui2*, Xiaoyan Wu1, Yuyao Zhang1, Luyao Wang1, Ruixin Hao1, Tianyi Gao1, Jinjiang Liang1, Yihang Yang1, Yi Yu1 and Wei Liu1*

*1State Key Laboratory of Quantum Functional Materials, School of Physical Science and Technology, Shanghai Key Laboratory of High-resolution Electron Microscopy, ShanghaiTech University, Shanghai 201210, China*

*2School of Materials Science and Engineering, Shanghai University, Shanghai, 200444, China*

* Corresponding author. E-mail: liuwei1@shanghaitech.edu.cn

E-mail: cui-yy@shu.edu.cn

**Supporting Information**

**
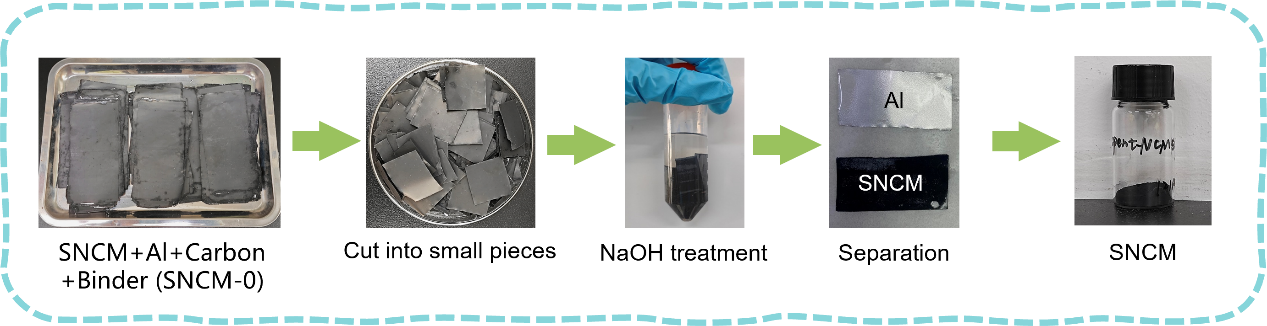
**

**Figure S1.** The process of obtaining SNCM powder via the separation treatment of waste NCM electrode sheets.


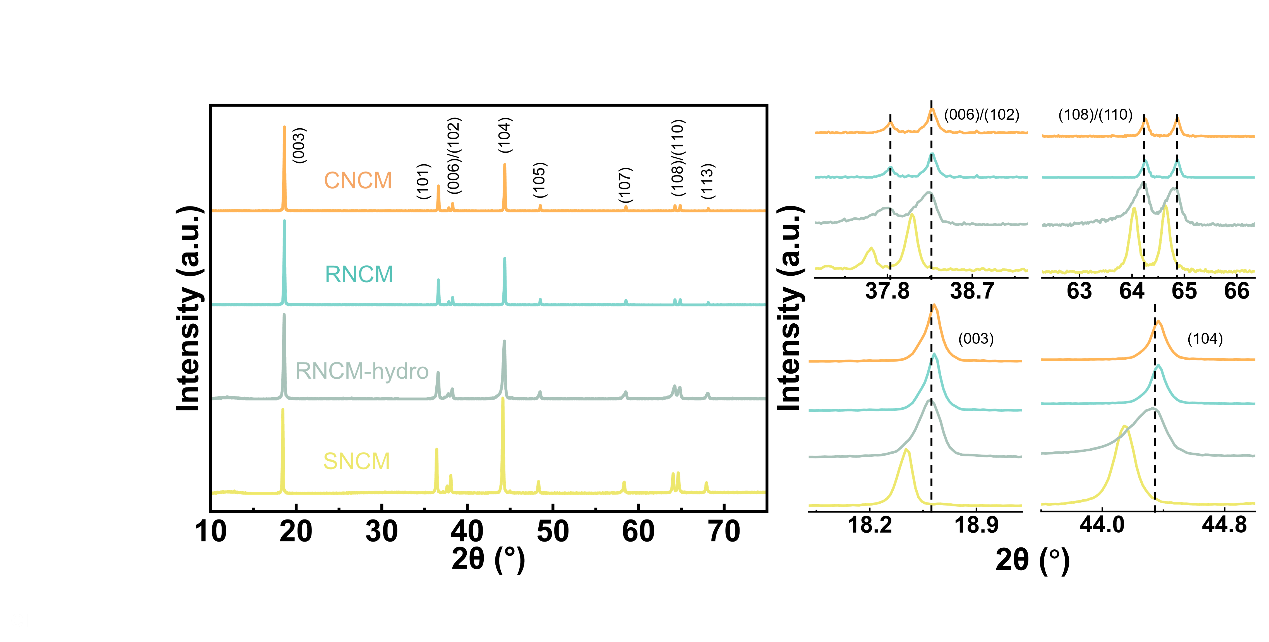


**Figure S2.** XRD patterns and partial enlarged details of SNCM, RNCM-hydro, RNCM and CNCM.


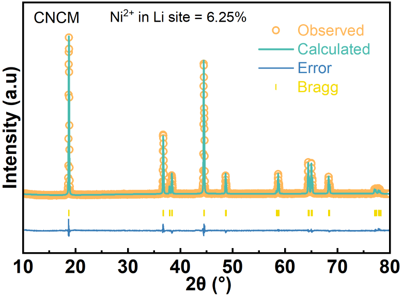


**Figure S3.** The*Rietveld* refinement XRD pattern of CNCM.

**
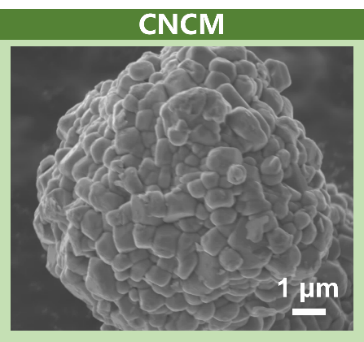
**

**Figure S4.** The SEM image of CNCM.


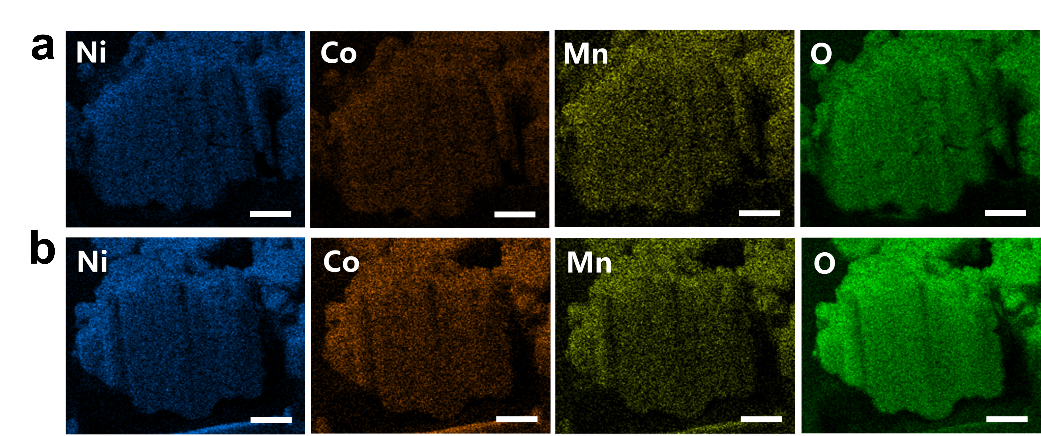


**Figure S5.** The distribution of Ni, Co, Mn, and O elements on the inner surfaces of the cut (a) SNCM and (b) RNCM-hydro particles. (Scale bar=1 μm)


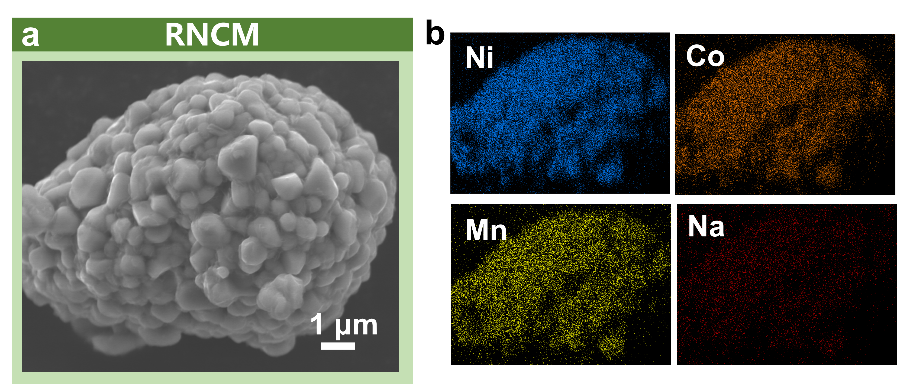


**Figure S6.** (a) The SEM image of RNCM and (b) the corresponding EDS mapping of Ni, Co, Mn and Na for RNCM.


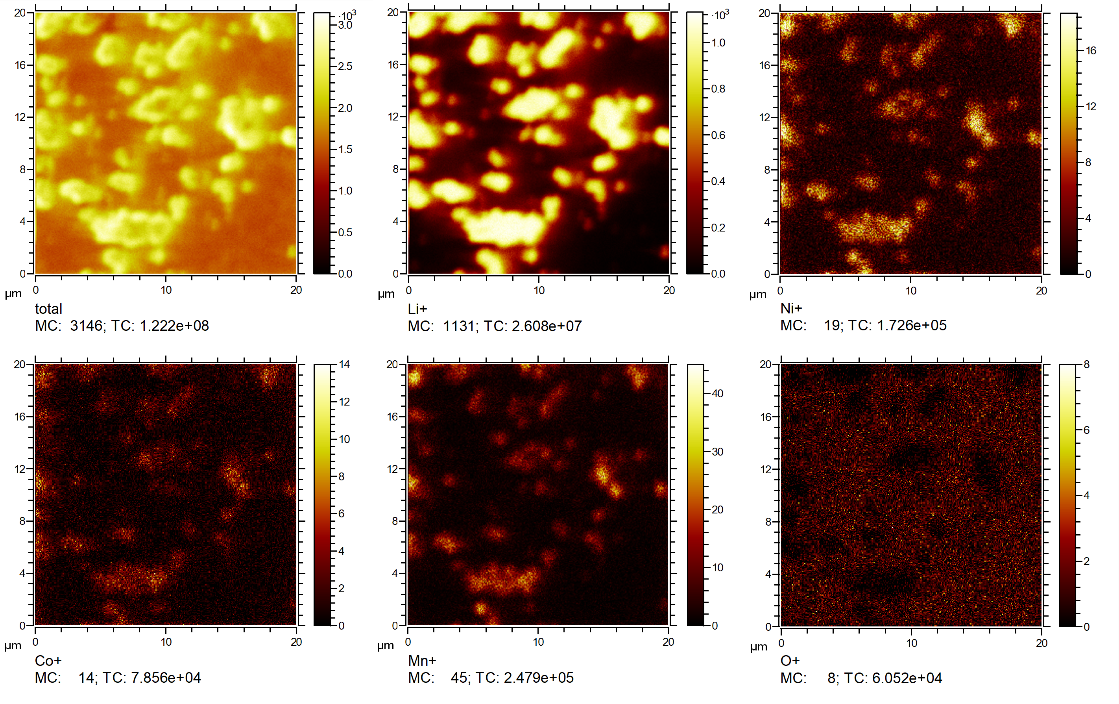


**Figure S7.** Surface TOF-SIMS chemical imaging of Li+, Ni+, Co+ and Mn+ species at RNCM.

**
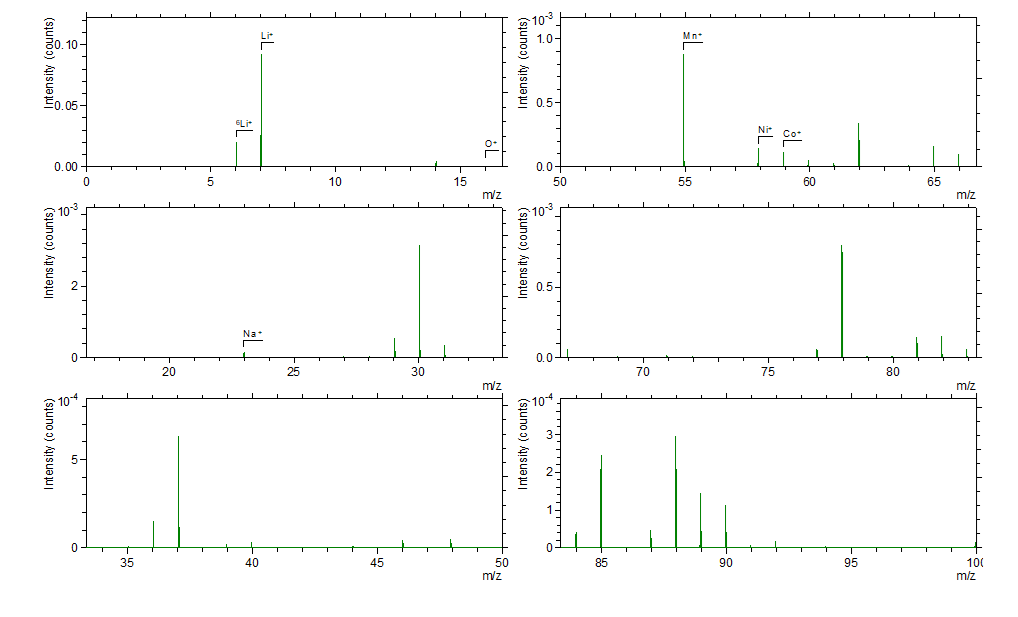
**

**Figure S8.** TOF-SIMS spectrum of Li+, Ni+, Co+, Mn+ and Na+ in RNCM cathode in positive ion mode.

**
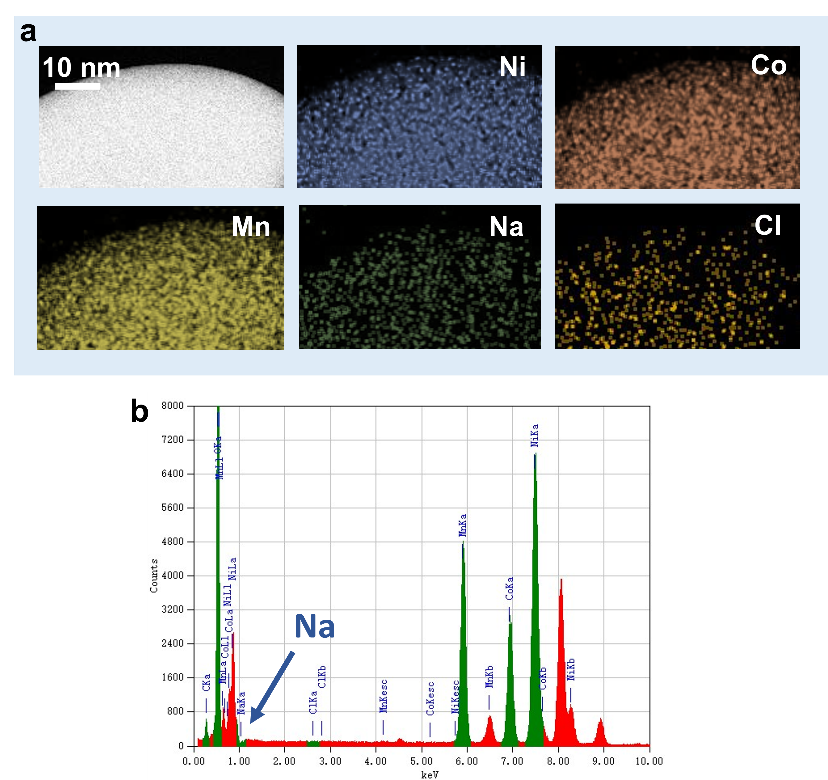
**

**Figure S9.** (a) STEM of RNCM and corresponding EDS mapping of Ni, Co, Mn, Na and Cl. (b) TEM-EDS spectra of RNCM.

**
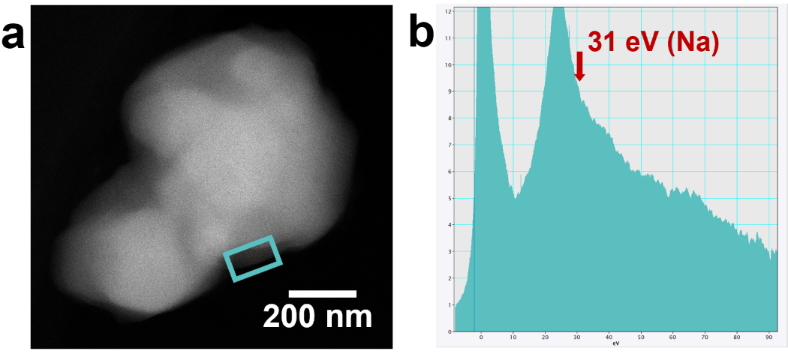
**

**Figure S10.** Na L-edge EELS spectra of RNCM-LN.


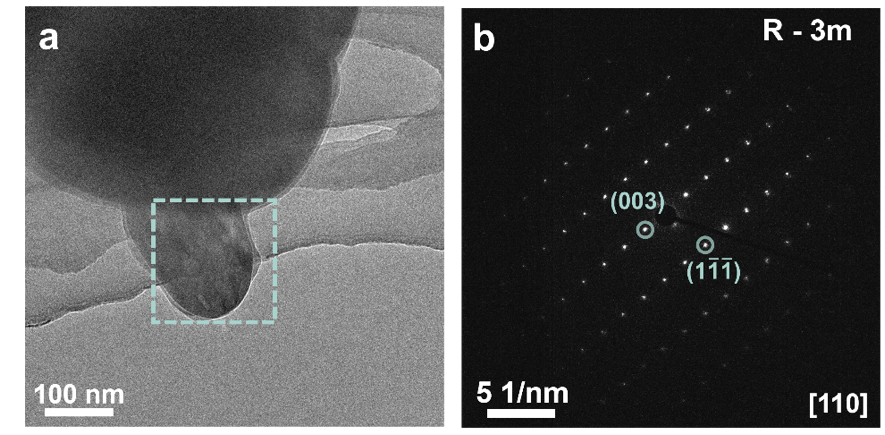


**Figure S11.** (a) Low-magnification TEM image of RNCM. (b) Diffraction information of the area within the dark green frame.

**
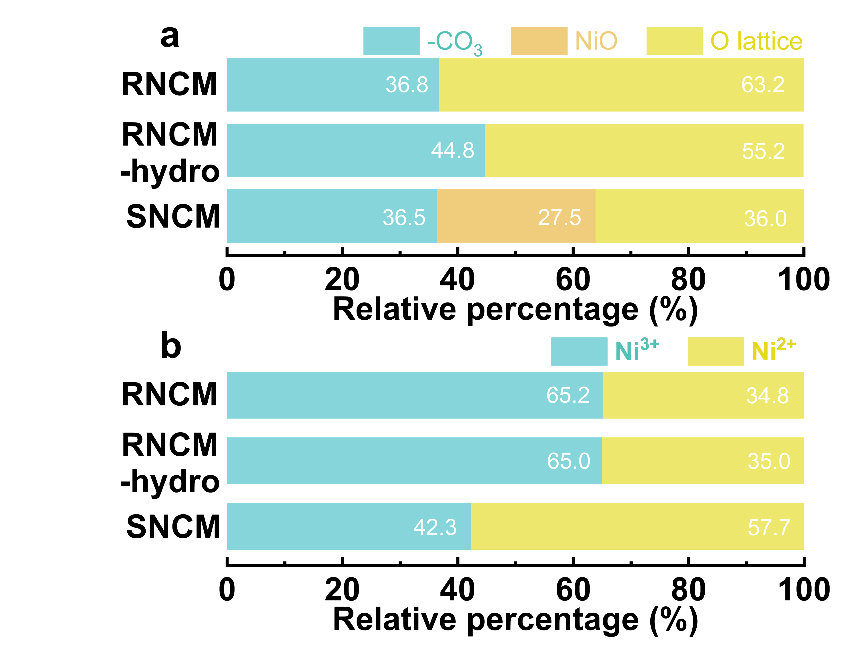
**

**Figure S12.** The proportion changes of (a) O and (b) Ni contents in SNCM, RNCM-hydro and RNCM.


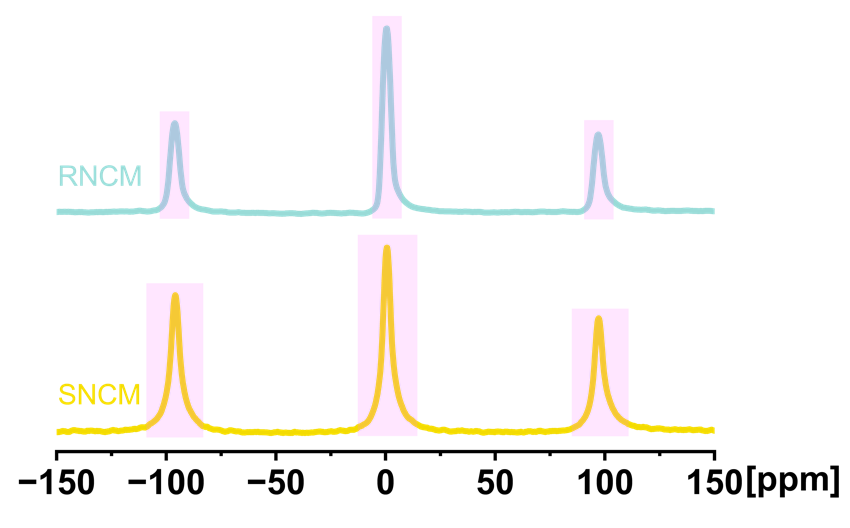


**Figure S13.** The 7Li MAS Solid NMR of SNCM and RNCM.


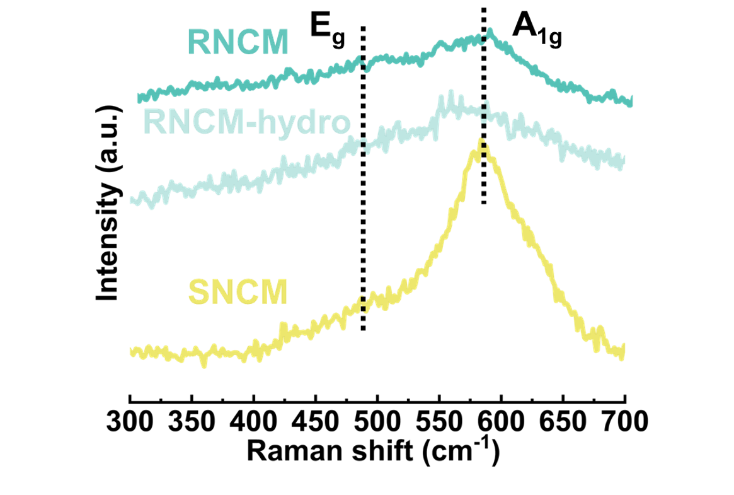


**Figure S14.** Raman spectra of SNCM, RNCM-hydro and RNCM.





**Figure S15.** FT-IR spectra of SNCM, RNCM-hydro and RNCM.

**
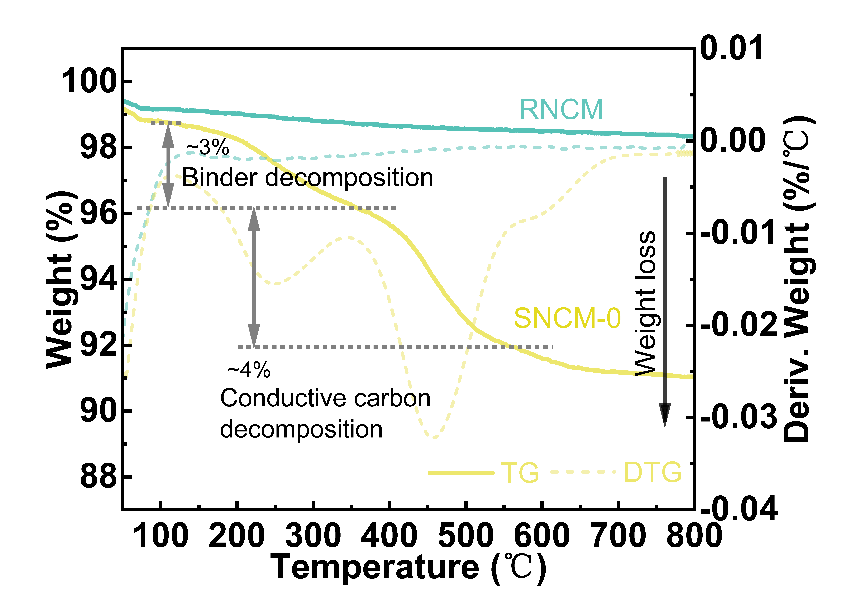
**

**Figure S16.** TG and DTG Curves of SNCM-0 and RNCM from RT to 800℃.

**
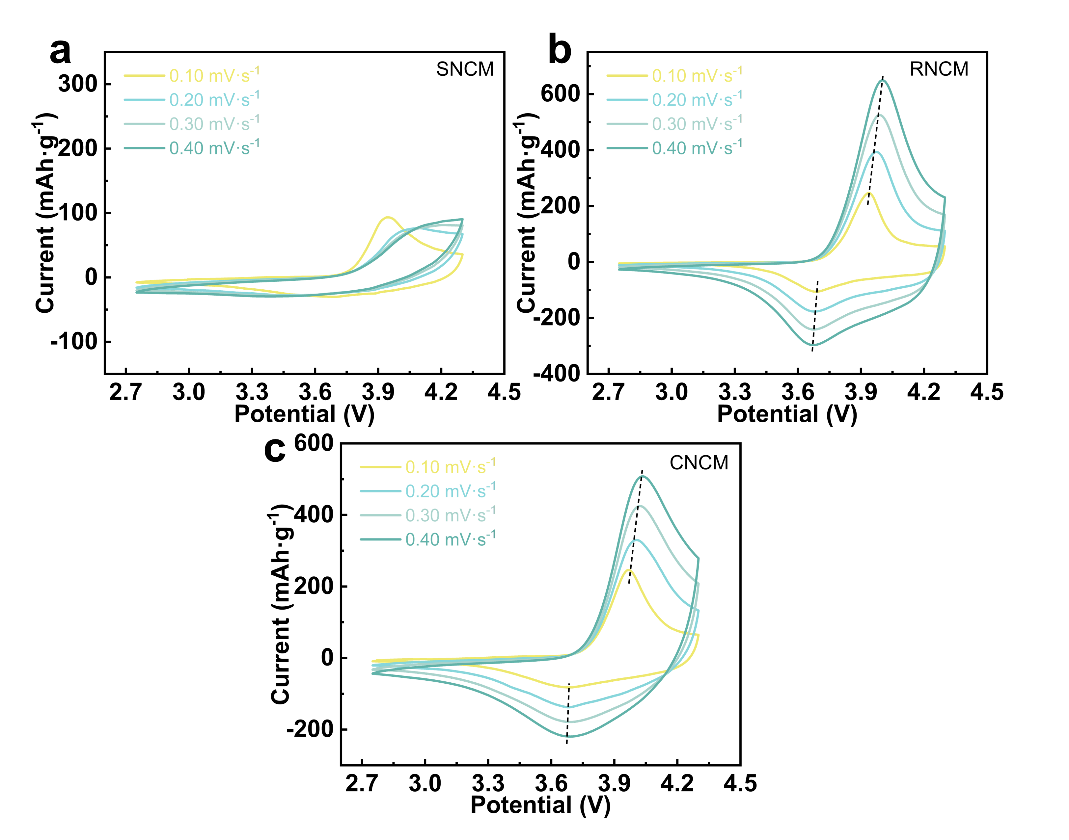
**

**Figure S17.** CV curves of (a) SNCM, (b) RNCM and (c) CNCM of different scan rates.

**
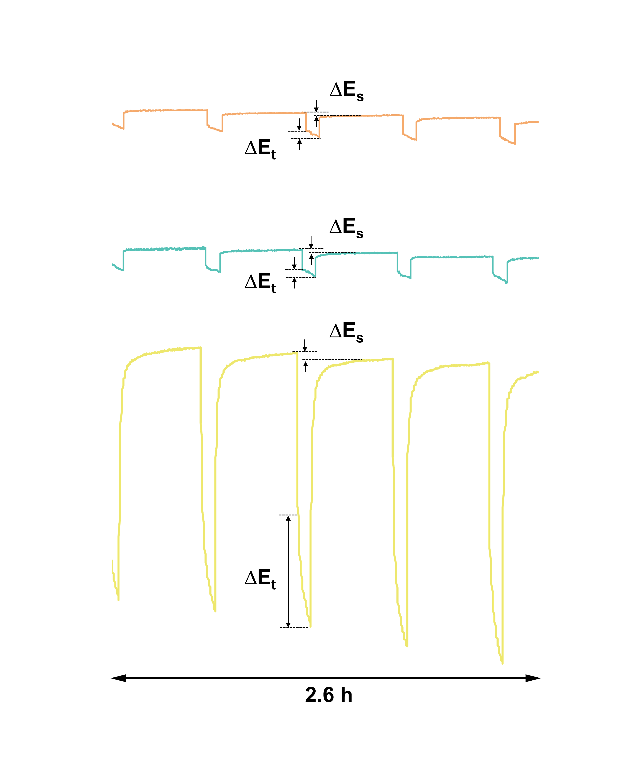
**

**Figure S18.** The magnified diagram of GITT voltage profiles.

**
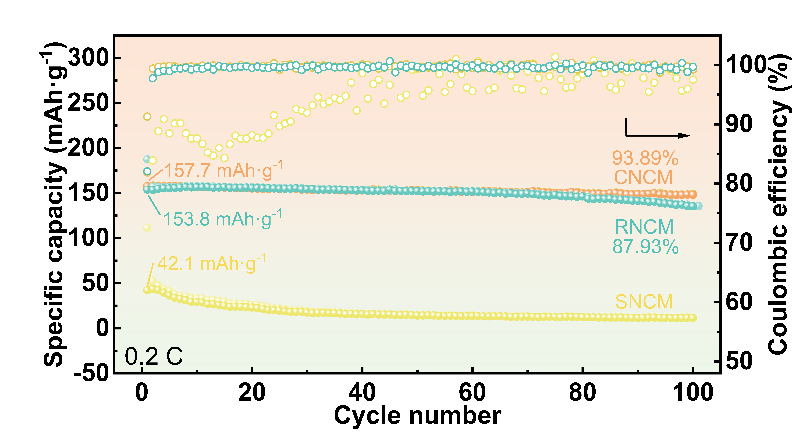
**

**Figure S19.** Cycling stability at 0.2 C in half cell of NCMs.


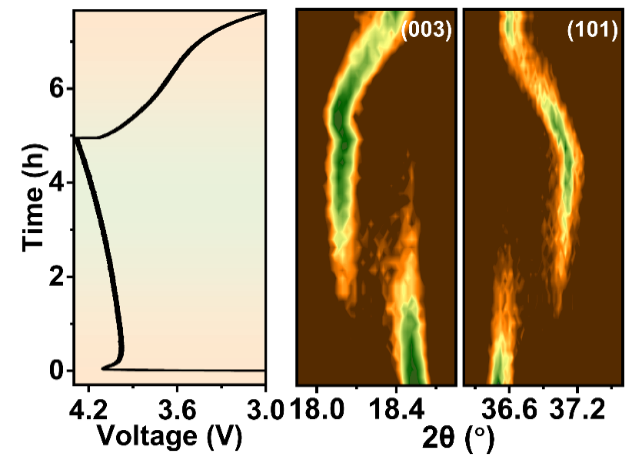


**Figure S20.** The selected in-situ XRD contour plots of CNCM and corresponding voltage curves.


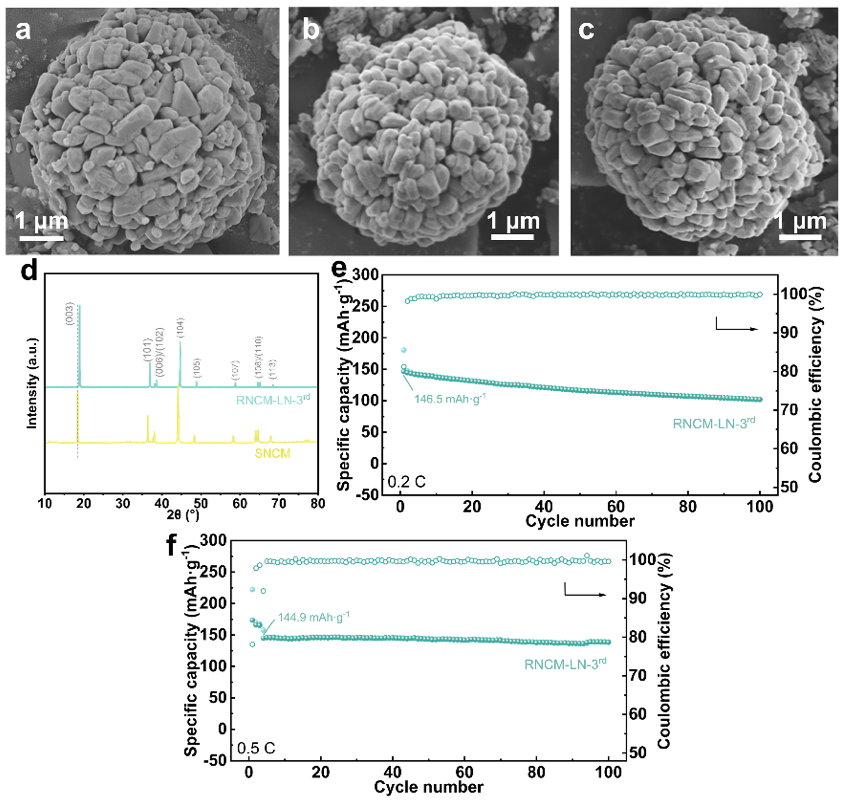


**Figure S21.** SEM images of (a) RNCM-1st, (b) RNCM -2nd and (c) RNCM-3rd. (d) XRD patterns of RNCM-3rd. Cycling performance in half cell of RNCM-3rd (e) at 0.2 C and (f) at 0.5 C.


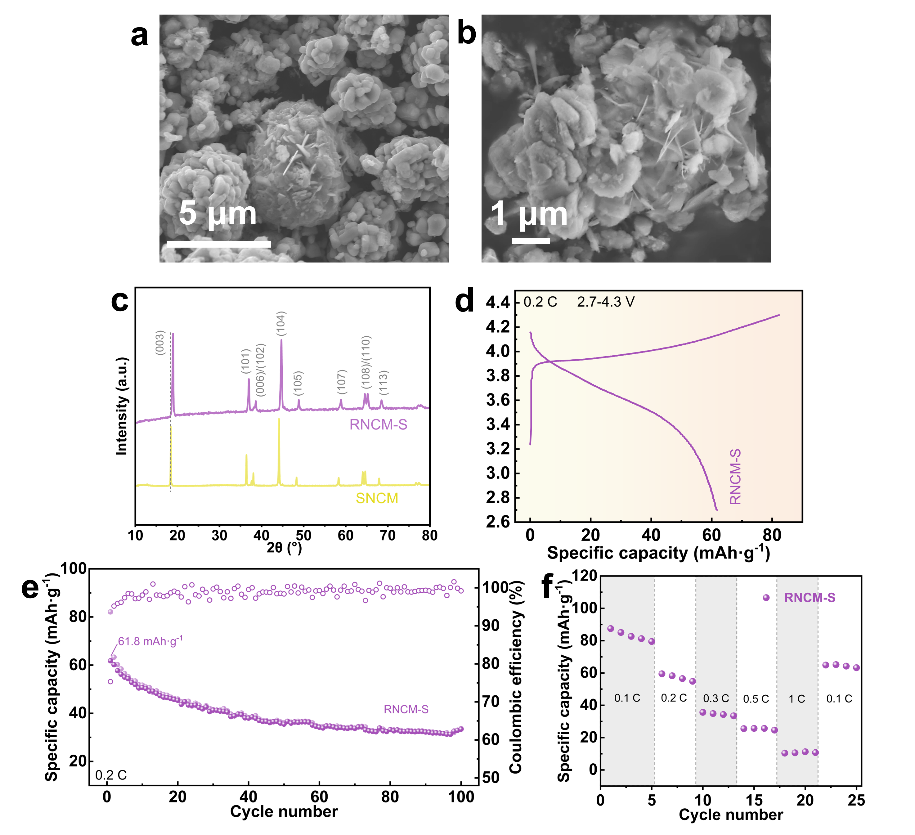


**Figure S22.** (a), (b) SEM images of RNCM-S (obtained by the solid-phase method). (c) XRD patterns of RNCM-S. (d), (e) and (f) The electrochemical performance of RNCM-S.


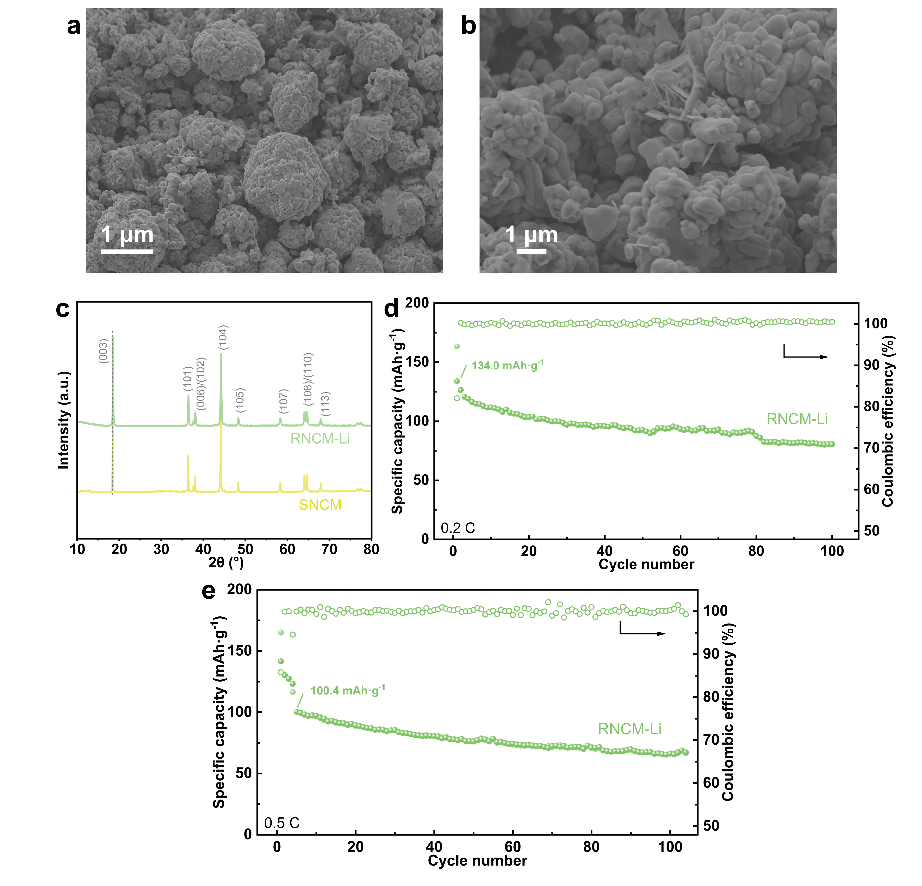


**Figure S23.** (a) and (b) SEM images of RNCM-Li. (c) XRD patterns of RNCM-Li. Cycling performance in half cell of RNCM-Na (d) at 0.2 C and (e) at 0.5 C.


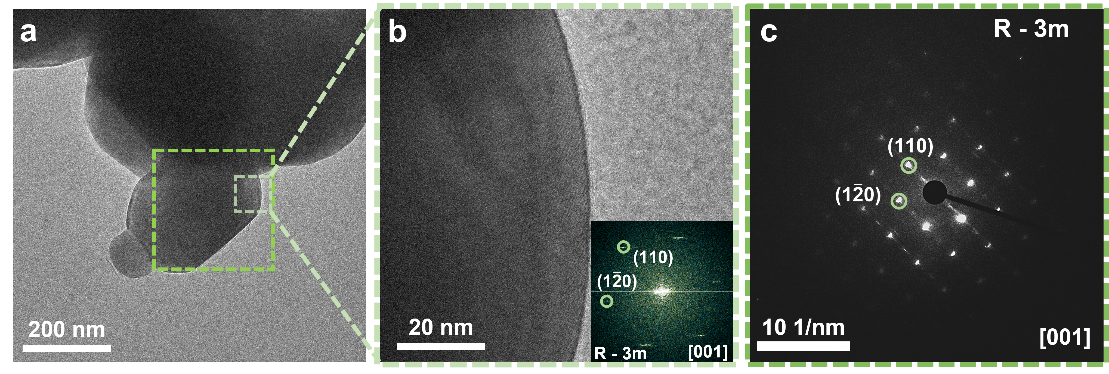


**Figure S24.** (a) Low-magnification TEM image of RNCM-Li. (b) TEM image of the area within the light green frame and the corresponding high-resolution information. (c) Diffraction information of the area within the dark green frame.


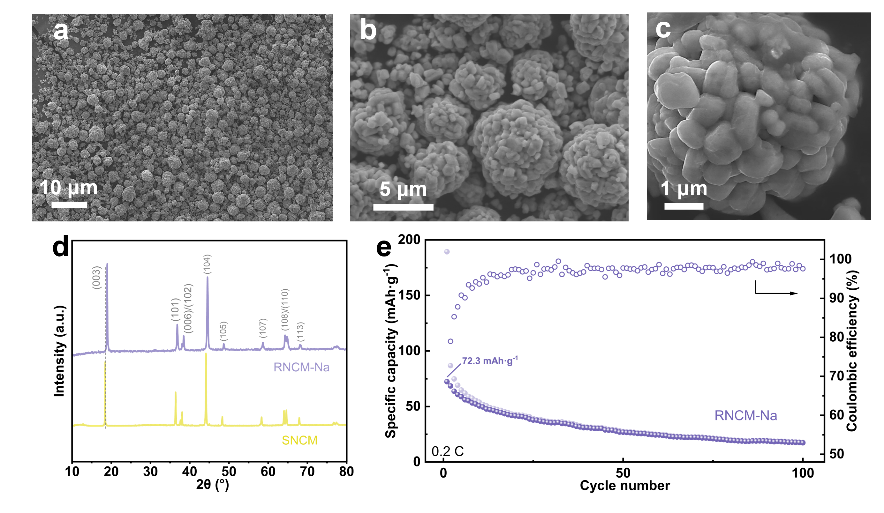


**Figure S25.** (a), (b) and (c) SEM images of RNCM-Na. (d) XRD patterns of RNCM-Na. (e) Cycling performance in half cell of RNCM-Naat 0.2 C.


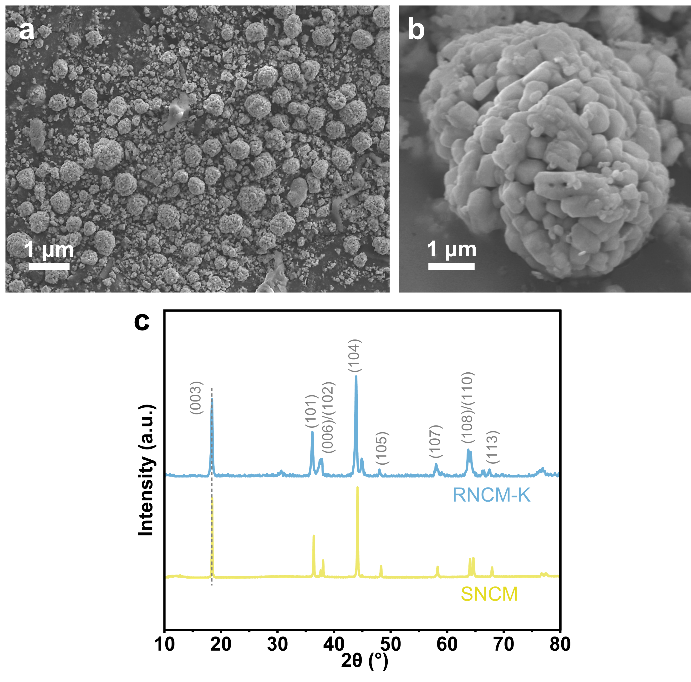


**Figure S26.** (a), (b) SEM images of RNCM-K. (c) XRD patterns of RNCM-K.


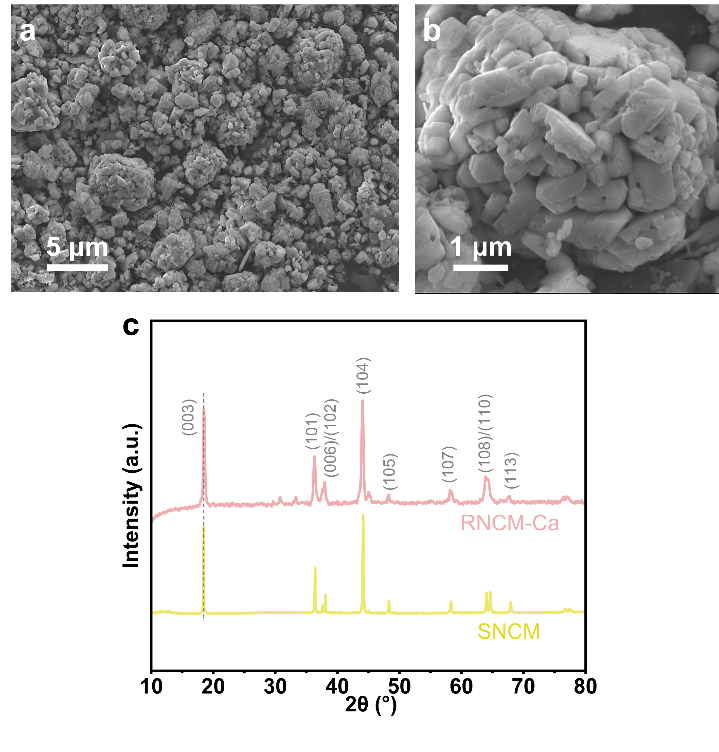


**Figure S27.** (a), (b) SEM images of RNCM-Ca. (c) XRD patterns of RNCM-Ca.


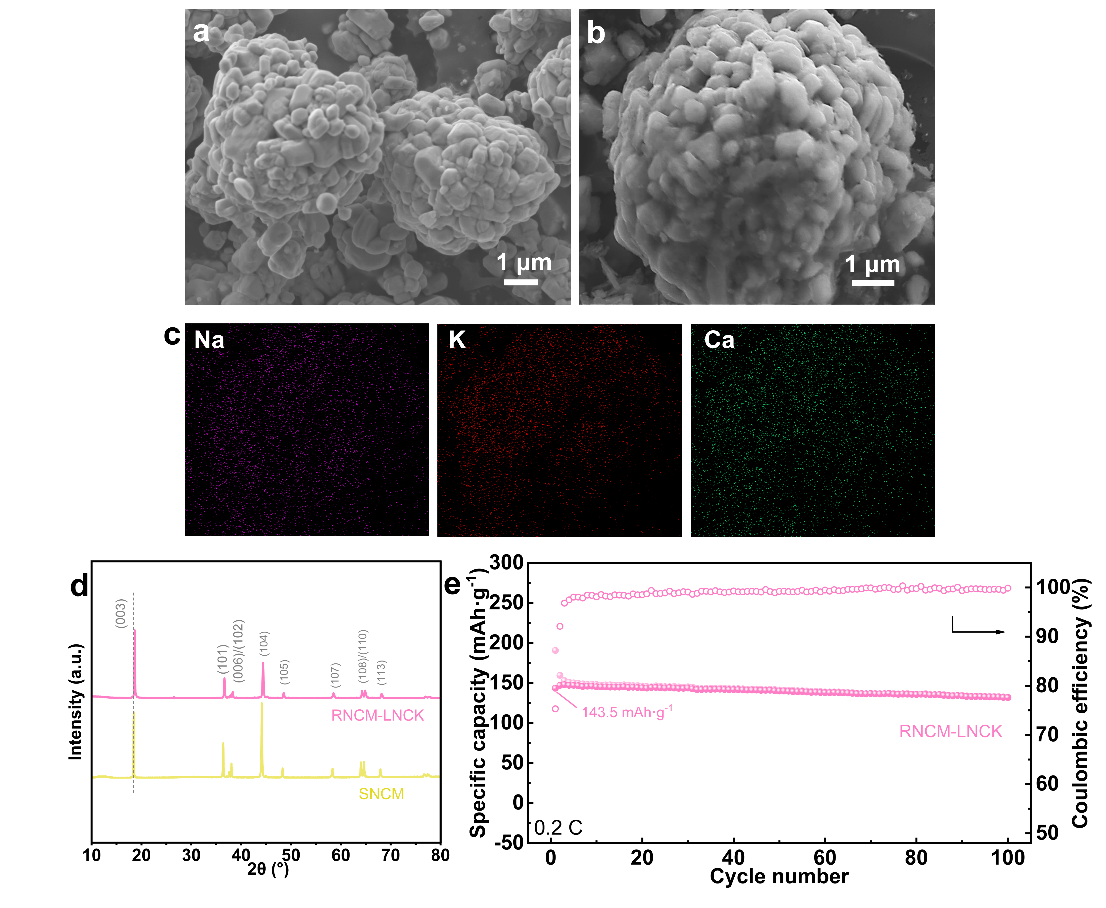


**Figure S28.** (a), (b) SEM images of RNCM-LNCK. (c) The corresponding Na, K and Ca EDS mapping of RNCM-LNCK. (d) XRD patterns of RNCM-LNCK. (e) Cycling performance in half cell of RNCM-LNCKat 0.2 C.

**Table S1.** Molar ratio of Li, Ni, Co and Mn in SNCM, CNCM and RNCM with different hydrothermal treatment temperature.

| Sample | Li/TM ratio | Ni/TM ratio | Co/TM ratio | Mn/TM ratio |
| --- | --- | --- | --- | --- |
| SNCM | 0.57 | 0.49 | 0.23 | 0.28 |
| RNCM-150 | 0.89 | 0.49 | 0.22 | 0.29 |
| RNCM-175 | 0.90 | 0.49 | 0.22 | 0.29 |
| RNCM-200 | 0.99 | 0.49 | 0.22 | 0.29 |
| CNCM | 1.02 | 0.50 | 0.21 | 0.29 |

**Table S2.** The XRD refinement results.

|  | a-axis (Å) | c-axis (Å) | Ni2+ in Li site (%) | c/a |
| --- | --- | --- | --- | --- |
| SNCM | 2.87926 | 14.27249 | 10.82 | 4.957 |
| RNCM-hydro | 2.86878 | 14.24439 | 5.80 | 4.965 |
| RNCM | 2.86714 | 14.22648 | 4.10 | 4.962 |
| CNCM | 2.86635 | 14.22002 | 6.25 | 4.961 |

**Table S3.** The details in calculation the atomic and electronic structures of NCM523 systems.

| Parameters | Settings | | |
| --- | --- | --- | --- |
| Pseudopotential type | Projector augmented wave (PAW) | | |
| Exchange-correlation functional | Generalized gradient approximation (GGA)  of Perdew–Burke–Ernzerh (PBE) | | |
| Valence electron configurations | O-2s22p4, Ni-3d64s2, Mn-3d64s1, Co-3d84s1  Li-2s1, Na-3s1, K-4s1 Ca-4s2 | | |
| Effective Coulomb repulsion (*U*eff) | 3.5 eV for Ni, 3.3 eV for Co, and 6.4 eV for Mn | | |
| Cutoff energy | 450 eV | | |
| Total energies convergence | 1×10-4 eV/unit cell | | |
| Systems | NCM bulk | NCM slab absorption with *M* (*M*=Li, Na, K, or Ca) | NCM bulk insertion with *M* (*M*=Li, Na, K, or Ca) |
| Number of atoms | 29 Li, 60 O, 9 Mn, 6 Co, 15 Ni | 30Li, 60 O, 9 Mn, 6 Co, 15 Ni, 1 *M* | 29Li, 60 O, 9 Mn, 6 Co, 15 Ni, 1 *M* |
| *k*-point meshes for optimization | 4×2×1 | 4×2×1 | 4×2×1 |
| Vacuum thickness (Å) | 0 | 15 | 0 |
| Relax ions | All atoms are relaxed. | Top 2 and bottom 2 layers are relaxed | All atoms are relaxed. |
| Change cell volume | Yes | No | Yes |
| Change cell shape | Yes | No | Yes |
